# Supplementary material
Source: Research Square preprint supplement (doi:10.21203/rs.3.rs-10339580/v1)
Supplement: Supplementary file 1 [file 9b346860bc98bfc0ea28c1e2.docx]

## **Appendix A: Complete Top 3 Exhaustive Testing Results**

(See Table 1, presented in Section 4.1 of the main text.)

## **Appendix B: Note on Missing Chinese 2-Year Yield Data**

Chinese 2-year government bond yields are missing for the period 2016–2018 (261 missing trading days in 2016, 260 in 2017, and 261 in 2018). Consequently, internal spreads involving the Chinese 2Y (CN_slope_10_2, CN_slope_5_2) cannot be calculated during this period. This paper uses the data-complete CN_slope_30_10 (China 30Y-10Y spread) as the core regime factor. In tests involving CN_slope_10_2, observations from the missing period are automatically excluded. Sensitivity analysis confirms that excluding or retaining these tests does not affect the core conclusions.

## **Appendix C: Note on German and Japanese Interest Rate Data Sources**

The Japanese 10-year government bond yield is from the FRED series IRLTLT01JPM156N (monthly frequency, from 1989), and the German 10-year government bond yield is from the FRED series IRLTLT01DEQ156N (quarterly frequency, from 1956). These two series are used as control variables in the alternative hypothesis exclusion tests (Table 8). The monthly and quarterly data are aligned to daily frequency via forward filling. Because these data are used only for robustness tests and not for the main regressions, the frequency difference does not affect the core conclusions.
